# Supplementary material
Source: MDPI journal article supplement (https://www.mdpi.com/2220-9964/12/8/322)
Supplement: s1 [file s1]

## Supplementary Materials

### List of publications used for the extractions of conditioning factors and predictors

1. Colaresi, M., & Mahmood, Z. (2017). Do the robot: Lessons from machine learning to improve conflict forecasting. *Journal of Peace Research*, 54(2), 193-214. <https://doi.org/10.1177/0022343316682065>
2. Arana-Catania, M., Van Lier, F. A., & Procter, R. (2022). Supporting peace negotiations in the Yemen war through machine learning. *Data & Policy*, 4, e28. <https://doi.org/10.1017/dap.2022.19>
3. Blair, R. A., & Sambanis, N. (2020). Forecasting Civil Wars: Theory and Structure in an Age of Big Data and Machine Learning. *Journal of Conflict Resolution*, 64(10), 1885-1915. <https://doi.org/10.1177/0022002720918923>
4. Kikuta, K. (2022). A new geography of civil war: a machine learning approach to measuring the zones of armed conflicts. *Political Science Research and Methods*, 10(1), 97-115. <https://doi.org/10.1017/psrm.2020.16>
5. D'Orazio, V., Honker, J., Prasad, R., & Shoemate, M. (2019). Modeling and Forecasting Armed Conflict: AutoML with Human-Guided Machine Learning. In 2019 IEEE International Conference on Big Data (Big Data) (pp. 4714-4723). IEEE. <https://doi.org/10.1109/BigData47090.2019.9005963>
6. Mueller, H., Groeger, A., Hersh, J., Matranga, A., & Serrat, J. (2021). Monitoring war destruction from space using machine learning. *Proceedings of the National Academy of Sciences of the United States of America*, 118(23), e2025400118. <https://doi.org/10.1073/pnas.2025400118>
7. Beger, A., Morgan, R. K., & Ward, M. D. (2021). Reassessing the Role of Theory and Machine Learning in Forecasting Civil Conflict. *Journal of Conflict Resolution*, 65(7-8), 1405-1426. <https://doi.org/10.1177/0022002720982358>
8. Bagozzi, B. E., & Koren, O. (2017). Using Machine Learning Methods to Identify Atrocity Perpetrators. In 2017 IEEE International Conference on Big Data (Big Data) (pp. 3042-3051). IEEE. <https://doi.org/10.1109/BigData.2017.8258276>
9. Henrickson, P. (2020). Predicting the costs of war. *Journal of Defense Modeling and Simulation: Applications, Methodology, Technology (JDMS)*, 17(3), 285-308. <https://doi.org/10.1177/1548512919826375>
10. Musumba, M., Fatema, N., & Kibriya, S. (2021). Prevention Is Better Than Cure: Machine Learning Approach to Conflict Prediction in Sub-Saharan Africa. *Sustainability*, 13(13), 7366. <https://doi.org/10.3390/su13137366>
11. Fawaz, M., & Le Quellec, E. (n.d.). Indirect Rivalries and Civil Wars: Empirical Evidence. *Defence and Peace Economics*. <https://doi.org/10.1080/10242694.2022.2129350>
12. Ge, Q. S., Hao, M. M., Ding, F. Y., Jiang, D., Scheffran, J., Helman, D., & Ide, T. (2022). Modelling armed conflict risk under climate change with machine learning and time-series data. *Nature Communications*, 13(1), 2839. <https://doi.org/10.1038/s41467-022-30356-x>
13. Goldfarb, A., & Lindsay, J. R. (2021). Prediction and Judgment: Why Artificial Intelligence Increases the Importance of Humans in War. *International Security*, 46(3), 7-50. [https://doi.org/10.1162/isec\\_a\\_00425](https://doi.org/10.1162/isec_a_00425)
14. Nardulli, P. F., Althaus, S. L., & Hayes, M. (2015). A PROGRESSIVE SUPERVISED-LEARNING APPROACH TO GENERATING RICH CIVIL STRIFE DATA. *Sociological Methodology*, 45, 148-183. <https://doi.org/10.1177/0081175015581378>
15. Hirose, K., Imai, K., & Lyall, J. (2017). Can civilian attitudes predict insurgent violence? Ideology and insurgent tactical choice in civil war. *Journal of Peace Research*, 54(1), 47-63. <https://doi.org/10.1177/0022343316675909>
16. Blair, R. A., & Sambanis, N. (2021). Is Theory Useful for Conflict Prediction? A Response to Beger, Morgan, and Ward. *Journal of Conflict Resolution*, 65(7-8), 1427-1453. <https://doi.org/10.1177/00220027211026748>
17. Ball, P., & Price, M. (2019). Using Statistics to Assess Lethal Violence in Civil and Inter-State War. *Annual Review of Statistics and Its Application*, 6, 63-84. <https://doi.org/10.1146/annurev-statistics-030718-105222>
18. Aung, T. S. (2021). Satellite analysis of the environmental impacts of armed-conflict in Rakhine, Myanmar. *Science of The Total Environment*, 781, 146758. <https://doi.org/10.1016/j.scitotenv.2021.146758>
19. Pinckney, J., & Daryakenari, B. R. (2022). When the Levee Breaks: A Forecasting Model of Violent and Nonviolent Dissent. *International Interactions*, 48(5), 997-1026. <https://doi.org/10.1080/03050629.2022.2090933>
20. Azuaje, F., Wang, H. Y., Zheng, H. R., Liu, C., Wang, H., & Rios-Morales, R. (2006). Integrative data mining for assessing international conflict events. In 2006 3rd International IEEE Conference Intelligent Systems (Vol. 1 and 2, pp. 460-465). IEEE. <https://doi.org/10.1109/IS.2006.348464>
21. Montoya, A. M., & Tellez, J. (2020). Who Wants Peace? Predicting Civilian Preferences in Conflict Negotiations. *Journal of Politics in Latin America*, 12(3), 252-276. <https://doi.org/10.1177/1866802X20960281>
22. Malone, I. (2022). Recurrent Neural Networks for Conflict Forecasting. *International Interactions*, 48(4), 614-632. <https://doi.org/10.1080/03050629.2022.2016736>
23. Blair, R. A., Blattman, C., & Hartman, A. (2017). Predicting local violence: Evidence from a panel survey in Liberia. *Journal of Peace Research*, 54(2), 298-312. <https://doi.org/10.1177/0022343316684009>
24. Al-Sarraj, W. F., & Lubbad, H. M. (2018). Bias Detection of Palestinian/Israeli Conflict in Western Media A Sentiment Analysis Experimental Study. In 2018 International Conference on Promising Electronic Technologies (ICPET 2018) (pp. 98-103). IEEE. <https://doi.org/10.1109/ICPET.2018.00024>

25. Popovic, M. (2018). Inter-Rebel Alliances in the Shadow of Foreign Sponsors. *International Interactions*, 44(4), 749-776. <https://doi.org/10.1080/03050629.2017.1414812>
26. Lowrance, C. J., Harris, E. R., & Pfaff, C. A. (2022). Expediting the Targeting Process Responsibly using Artificial Intelligence. In *Artificial Intelligence and Machine Learning for Multi-Domain Operations Applications IV* (Vol. 12113, 1211307). SPIE. <https://doi.org/10.1117/12.2619098>
27. Chadeaux, T. (2022). A shape-based approach to conflict forecasting. *International Interactions*, 48(4), 633-648. <https://doi.org/10.1080/03050629.2022.2009821>
28. Le, D. D., Pham, V., & Dang, T. (2020). Securing Autonomous Systems in Multi-domain Tactical Environment. In *Artificial Intelligence and Machine Learning for Multi-Domain Operations Applications II* (Vol. 11413, 1141320). SPIE. <https://doi.org/10.1117/12.2558640>
29. Furnkranz, J., Petrak, J., & Trapp, R. (1997). Knowledge discovery in international conflict databases. *Applied Artificial Intelligence*, 11(2), 91-118. <https://doi.org/10.1080/088395197118262>
30. Mueller, H., & Rau, C. (2022). Using Past Violence and Current News to Predict Changes in Violence. *International Interactions*, 48(4), 579-596. <https://doi.org/10.1080/03050629.2022.2063853>
31. Rohith, C., & Batth, R. S. (2019). Cyber Warfare: Nations Cyber Conflicts, Cyber Cold War Between Nations and its Repercussion. In *Proceedings of 2019 International Conference on Computational Intelligence and Knowledge Economy (ICCIKE' 2019)* (pp. 641-646). IEEE. <https://doi.org/10.1109/ICCIKE47802.2019.9004236>
32. Ahmed, F., Vaishnavi, P., Eykholt, K., & Rahmati, A. (2022). Ares: A System-Oriented Wargame Framework for Adversarial ML. In *2022 43rd IEEE Symposium on Security and Privacy Workshops (SPW 2022)* (pp. 73-79). IEEE. <https://doi.org/10.1109/SPW54247.2022.9833895>
33. Rendon-Cardona, P., Gil-Gonzalez, J., Paez-Valdez, J., & Rivera-Henao, M. (2022). Self-Supervised Sentiment Analysis in Spanish to Understand the University Narrative of the Colombian Conflict. *Applied Sciences-Basel*, 12(11), 5472. <https://doi.org/10.3390/app12115472>
34. Obukhov, T., & Brovelli, M. A. (2022). Defining a Methodology for Integrating Semantic, Geospatial, and Temporal Techniques for Conflict Analysis. *XXIV ISPRS Congress Imaging Today, Foreseeing Tomorrow, Commission IV*, 43-B4, 155-161. <https://doi.org/10.5194/isprs-archives-XLIII-B4-2022-155-2022>
35. Hurriyetoglu, A., Tanev, H., Zavarella, V., Piskorski, J., Yeniterzi, R., Yoruk, E., Mutlu, O., Yuret, D., & Villavicencio, A. (2021). Challenges and Applications of Automated Extraction of Socio-political Events from Text (CASE 2021): Workshop and Shared Task Report. In *CASE 2021: The 4th Workshop on Challenges and Applications of Automated Extraction of Socio-Political Events from Text (CASE)* (pp. 1-9). <https://aclanthology.org/2021.case-1.0>
36. Muller-Crepon, C., & Hunziker, P. (2018). New spatial data on ethnicity: Introducing SIDE. *Journal of Peace Research*, 55(5), 687-698. <https://doi.org/10.1177/0022343318764254>
37. Rastogi, S., & Bansal, D. (2021). Visualization of Twitter Sentiments on Kashmir Territorial Conflict. *Cybernetics and Systems*, 52(8), 642-669. <https://doi.org/10.1080/01969722.2021.1949520>
38. Srinivasan, D., Varsha, J., Bharathi, B., Thenmozhi, D., & Kumar, B. S. (2022). SSNCSE\_NLP@LT-EDI-ACL2022: Hope Speech Detection for Equality, Diversity and Inclusion using sentence transformers. In *Proceedings of the Second Workshop on Language Technology for Equality, Diversity and Inclusion (LTEDI 2022)* (pp. 218-222). <https://doi.org/10.18653/v1/2022.ltedi-1.30>
39. Nikitha, M. A., Swetha, B. S. S., Mantripragada, K. H., & Jayapandian, N. (2022). The Future Warfare with Multidomain Applications of Artificial Intelligence: Research Perspective. In *Proceedings of Second International Conference on Sustainable Expert Systems (ICSSES 2021)* (Vol. 351, pp. 329-341). Springer. [https://doi.org/10.1007/978-981-16-7657-4\\_28](https://doi.org/10.1007/978-981-16-7657-4_28)
40. Cheong, M., & Alfano, M. (2021). To Honor our Heroes: Analysis of the Obituaries of Australians Killed in Action in WWI and WWII. In *2020 25th International Conference on Pattern Recognition (ICPR)* (pp. 6965-6972). IEEE. <https://doi.org/10.1109/ICPR48806.2021.9413145>
41. Hao, M. M., Ding, F. Y., Xie, X. L., Fu, J. Y., Qian, Y. S., Ide, T., Maystadt, J. F., Chen, S., Ge, Q. S., & Jiang, D. (2022). Varying climatic-social-geographical patterns shape the conflict risk at regional and global scales. *Humanities & Social Sciences Communications*, 9(1), 276. <https://doi.org/10.1057/s41599-022-01294-2>
42. Hegre, H., Allansson, M., Basedau, M., Colaresi, M., Croicu, M., Fjelde, H., Hoyle, F., Hultman, L., Hogbladh, S., Jansen, R., Mouhleb, N., Muhammad, S. A., Nilsson, D., Nygard, H. M., Olafsdottir, G., Petrova, K., Randahl, D., Rod, E. G., Schneider, G., von Uexkull, N., & Vestby, J. (2019). ViEWS: A political violence early-warning system. *Journal of Peace Research*, 56(2), 155-174. <https://doi.org/10.1177/0022343319823860>
43. Linke, A. M., Witmer, F. D. W., & O'Loughlin, J. (2022). Weather variability and conflict forecasts: Dynamic human-environment interactions in Kenya. *Political Geography*, 92, 102489. <https://doi.org/10.1016/j.polgeo.2021.102489>
44. Morrow, N., Mock, N. B., Gatto, A., LeMense, J., & Hudson, M. (2022). Protective Pathways: Connecting Environmental and Human Security at Local and Landscape Level with NLP and Geospatial Analysis of a Novel Database of 1500 Project Evaluations. *Land*, 11(1), 123. <https://doi.org/10.3390/land11010123>
45. Plakandaras, V., Gogas, P., & Papadimitriou, T. (2018). The effects of geopolitical uncertainty in forecasting financial markets: A machine learning approach. *Algorithms*. <https://doi.org/10.3390/a12010001>
46. EC JRC European Commission, Joint Research Centre, Thomakos, D., Has, S., Saporiti, F., et al. (2018). Global Conflict Risk Index (GCRI): New variables in 2018. Publications Office. <https://data.europa.eu/doi/10.2760/258293>
